# Supplementary material for: Related factors and characteristics of malocclusion in preschool children aged 3–6 years
Source: Research Square preprint supplement (doi:10.21203/rs.3.rs-1767947/v1), 2022-07-01
Supplement: Supplementary file 1 [file 9469041d894e6adfcd601345.xlsx]

## Sheet: Table 1
	Table 1: Prevalence of each type of malocclusion in preschool children aged 3–6 years
		3 years old	4 years old	5 years old	6 years old	Total
		(n=119)	(n=171)	(n=146)	(n=67)	(n=503)
	Sagittal relationship	0.42	0.333	0.377	0.388	0.374
	Anterior crossbite (AC)	0.118	0.07	0.109	0.09	0.095
	( mild / moderate )	(3.4% / 8.4%)	(1.8% / 5.3%)	(3.4% / 7.5%)	(1.5% / 7.5%)	(2.6% / 7.0%)
	Excessive Overjet (E)	0.303	0.263	0.267	0.299	0.278
	Vertical relationship	0.294	0.333	0.26	0.328	0.302
	Deep overbite (D)	0.235	0.263	0.185	0.239	0.231
	Anterior open bite (AO)	0.059	0.07	0.075	0.09	0.072
	Transversal relationship	0	0	0	0	0
	Posterior crossbite	0	0	0	0	0
	Scissors bite	0	0	0	0	0
	Space discrepancies	0.16	0.076	0.123	0.119	0.115
	Crowding (C)	0.16	0.076	0.123	0.119	11.5%**
	Multiple types of malocclusion	0.202	0.158	0.164	0.164	0.172
	Total	0.672	0.585	0.596	0.672	0.62
	** : P<0.01 (Chi-squared test between boys and girls)

## Sheet:  Table 2
	Table 2: Prevalence of dentition traits in preschool children aged 3–6 years
		3 years old	4 years old	5 years old	6 years old	Total
		(n=119)	(n=171)	(n=146)	(n=67)	(n=503)
	Mandibular midline deviation	0.353	0.433	0.432	0.358	0.404
	right	0.176	0.287	0.253	0.224	24.3%a
	left	0.176	0.146	0.178	0.134	0.161
	Unspaced dentitions	0.403	0.316	0.315	0.269	33.0%b
	a: P<0.01 (Chi-squared test between right and left)
	b: P<0.01 (Chi-squared test between boys and girls)

## Sheet: Table 3
	Table 3: Oral habits and nose and throat conditions in preschool children aged 3–6 years
		3 years old	4 years old	5 years old	6 years old	Total
		(n=119)	(n=171)	(n=146)	(n=67)	(n=503)
	Incompetent lip seal	0.260504	0.327485	0.253425	0.238806	0.278
	severe	0.12605	0.175439	0.157534	0.164179	0.157
	Habit
	Nail biting	0.159664	0.222222	0.171233	0.19403	0.189
	Finger sucking	0.0756303	0.0818713	0.0684932	0.0895522	7.8%
	Lip sucking or lip biting	0.0504202	0.0116959	0.0410959	0.0149254	3.0%
	Chin resting on a hand	0.00840336	0.00584795	0.062	0.075	3.2%a,b
	Nose and throat condition
	Nasal obstruction	0.302521	0.345	0.274	0.269	0.304
	Allergic rhinitis	0.059	0.17	0.185	0.343	17.1%a,b
	Palatine tonsil hypertrophy	0.0168067	0.0409357	0.0342466	0.0597015	3.6%c
	a: P<0.001 (Cochran-Armitage test for trend)
	b: P<0.05 (Chi-squared test between boys and girls)
	c: P<0.01 (Chi-squared test between boys and girls)

## Sheet: Table　4
	Table 4: Related factors and characteristics of malocclusion compared with normal occlusion
		Normal	Malocclusion	P
		(n=191)	(n=312)
	Boy ratio	0.518325	0.509615	n.p.
	Incompetent lip seal	0.199	0.327	<0.01
	Severe incompetent lip seal	0.089	0.199	<0.001
	Nail biting	0.236	0.16	<0.05
	Finger sucking	0.052	0.093	n.p.†
	Lip sucking or lip biting	0.021	0.035	n.p.†
	Chin resting on a hand	0.042	0.035	n.p.†
	Nasal obstruction	0.251	0.327	n.p.
	Allergic rhinitis	0.173	0.17	n.p.
	Palatine tonsil hypertrophy	0.01	0.051	<0.05†
	†: Fisher’s exact test

## Sheet: Table 5
	Table 5: Binary logistic regression analysis of related factors and malocclusion
		B	SE	Adjusted OR (95% CI)	P
	Age	-0.025	0.097	0.975 (0.806-1.180)	0.797
	Sex	-0.051	0.192	0.950 (0.653-1.383)	0.790
	Incompetent lip seal	0.609	0.222	1.838 (1.189-2.841)	0.006
	Nail biting	-0.470	0.237	0.625 (0.393-0.994)	0.047
	Finger sucking	0.548	0.388	1.730 (0.809-3.701)	0.158
	Lip sucking or lip biting	0.199	0.623	1.220 (0.360-4.139)	0.749
	Chin resting on a hand	0.264	0.587	1.302 (0.412-4.115)	0.653
	Nasal obstruction	0.352	0.211	1.422 (0.940-2.152)	0.095
	Palatine tonsil hypertrophy	1.449	0.771	4.260 (0.940-19.308)	0.060
	Adjusted by age, sex, incompetent lip seal, finger sucking, lip sucking or lip biting, nail biting, chin resting on a hand, stuffy nose, and palatine tonsil hypertrophy

## Sheet: Table　6
	Table 6: Characteristics related to lifestyle habits and nose and throat conditions in major malocclusions
		Excessive overjet	Deep overbite	Crowding
		(n=140)	(n=117)	(n=58)
	Boy ratio	0.607	0.513	0.345
	Incompetent lip seal	0.414	0.325	0.259
	Severe incompetent lip seal	0.257	0.162	0.138
	Nail biting	0.129	0.145	0.172
	Finger sucking	0.143	0.017	0.069
	Lip sucking or lip biting	0.057	0.017	0.034
	Chin resting on a hand	0.043	0.043	0.017
	Nasal obstruction	0.329	0.308	0.293
	Allergic rhinitis	0.179	0.128	0.19
	Palatine tonsil hypertrophy	0.064	0.034	0.052
